# Supplementary material for: Carbohydrate recognition and complement activation by rat ficolin-B
Source: PubMed Central journal article supplement (PMC3179595; doi:10.1002/eji.201040612), 2010-10-27
Supplement: eji0041-0214-SD1.pdf [file eji0041-0214-SD1.pdf]

# European Journal of Immunology

**Supporting Information**

**for**

**DOI 10.1002/eji.201040612**

**Carbohydrate recognition and complement activation by rat ficolin-B**

Umakhanth Venkatraman Girija, Daniel A. Mitchell, Silke Roscher and Russell Wallis

## Glycan binding by rat ficolins-A and -B.

Details of spacer arms (Sp) can be found at <http://www.functionalglycomics.org>

| Glycan number | Glycan name                                                                                      | Ficolin-A       |                | Ficolin-B       |                |
|---------------|--------------------------------------------------------------------------------------------------|-----------------|----------------|-----------------|----------------|
|               |                                                                                                  | Average binding | Standard error | Average binding | Standard error |
| 1             | Neu5Ac2-8Neu5Ac-Sp8                                                                              | 46              | 47             | 10              | 10             |
| 2             | Neu5Ac2-8Neu5Ac-Sp17                                                                             | 4003            | 2270           | 11811           | 6744           |
| 3             | Neu5Ac2-8Neu5Ac2-8Neu5Ac-Sp8                                                                     | 92              | 32             | 16240           | 8995           |
| 4             | Neu5Gc2-6Galβ1-4GlcNAc-Sp8                                                                       | 25              | 15             | 39              | 78             |
| 5             | Galβ1-3GlcNAcβ1-2Manα1-3(Galβ1-3GlcNAcβ1-2Manα1-6)Manβ1-4GlcNAcβ1-4GlcNAc-Sp19                   | 19              | 3              | -26             | 10             |
| 6             | Neu5Ac2-6Galβ1-4GlcNAcβ1-2Manα1-3(Neu5Ac2-6Galβ1-4GlcNAcβ1-2Manα1-6)Manβ1-4GlcNAcβ1-4GlcNAc-Sp12 | 197             | 160            | 281             | 88             |
| 7             | α-D-Gal-Sp8                                                                                      | 156             | 43             | 399             | 201            |
| 8             | α-D-Glc-Sp8                                                                                      | 165             | 48             | 4               | 22             |
| 9             | α-D-Man-Sp8                                                                                      | 117             | 44             | 314             | 102            |
| 10            | α-GalNAc-Sp8                                                                                     | 237             | 40             | 43              | 38             |
| 11            | α-L-Fuc-Sp8                                                                                      | 222             | 179            | 965             | 688            |
| 12            | α-L-Fuc-Sp9                                                                                      | 128             | 71             | 5               | 27             |
| 13            | α-L-Rha-Sp8                                                                                      | -44             | 18             | 44              | 84             |
| 14            | α-Neu5Ac-Sp8                                                                                     | -28             | 22             | 52              | 23             |
| 15            | α-Neu5Ac-Sp11                                                                                    | 105             | 33             | 390             | 424            |
| 16            | β-Neu5Ac-Sp8                                                                                     | 46              | 19             | 1279            | 767            |
| 17            | β-D-Gal-Sp8                                                                                      | 15              | 12             | 1204            | 872            |
| 18            | β-D-Glc-Sp8                                                                                      | 276             | 8              | -20             | 3              |
| 19            | β-D-Man-Sp8                                                                                      | 80              | 31             | 178             | 70             |
| 20            | β-GalNAc-Sp8                                                                                     | 133             | 46             | -9              | 6              |
| 21            | β-GlcNAc-Sp0                                                                                     | 184             | 78             | 196             | 186            |
| 22            | β-GlcNAc-Sp8                                                                                     | 201             | 38             | -5              | 4              |
| 23            | β-GlcN(Gc)-Sp8                                                                                   | 149             | 51             | 48              | 41             |
| 24            | (Galβ1-4GlcNAcβ1-3,6-GalNAc-Sp8                                                                  | 84              | 48             | 19              | 30             |
| 25            | GlcNAcβ1-3(GlcNAcβ1-4)(GlcNAcβ1-6)GlcNAc-Sp8                                                     | 497             | 441            | 478             | 201            |
| 26            | [3OSO3][6OSO3]Galβ1-4[6OSO3]GlcNAc-Sp0                                                           | -25             | 16             | 46              | 10             |
| 27            | [3OSO3][6OSO3]Galβ1-4GlcNAc-Sp0                                                                  | -4              | 28             | 41              | 80             |
| 28            | [3OSO3]Galβ1-4Glc-Sp8                                                                            | -17             | 9              | -23             | 37             |
| 29            | [3OSO3]Galβ1-4(6OSO3)Glc-Sp0                                                                     | 177             | 41             | -29             | 11             |
| 30            | [3OSO3]Galβ1-4(6OSO3)Glc-Sp8                                                                     | 413             | 213            | 956             | 705            |
| 31            | [3OSO3]Galβ1-3(Fuca1-4)GlcNAc-Sp8                                                                | 141             | 87             | 52              | 14             |
| 32            | [3OSO3]Galβ1-3GalNAc-Sp8                                                                         | 88              | 85             | 144             | 85             |
| 33            | [3OSO3]Galβ1-3GlcNAc-Sp8                                                                         | 224             | 189            | -14             | 16             |
| 34            | [3OSO3]Galβ1-4(Fuca1-3)GlcNAc-Sp8                                                                | 110             | 40             | -9              | 8              |
| 35            | [3OSO3]Galβ1-4[6OSO3]GlcNAc-Sp8                                                                  | 292             | 193            | 46              | 80             |
| 36            | [3OSO3]Galβ1-4GlcNAc-Sp0                                                                         | 58              | 3              | 91              | 66             |
| 37            | [3OSO3]Galβ1-4GlcNAc-Sp8                                                                         | 35              | 26             | 244             | 190            |
| 38            | [3OSO3]Gal-Sp8                                                                                   | -12             | 11             | 40              | 14             |
| 39            | [4OSO3][6OSO3]Galβ1-4GlcNAc-Sp0                                                                  | 30              | 84             | 729             | 723            |
| 40            | [4OSO3]Galβ1-4GlcNAc-Sp8                                                                         | 193             | 116            | -28             | 20             |
| 41            | 6-H <sub>2</sub> PO <sub>3</sub> Manα-Sp8                                                        | 215             | 86             | 436             | 240            |
| 42            | [6OSO3]Galβ1-4Glc-Sp0                                                                            | 412             | 53             | 38              | 53             |
| 43            | [6OSO3]Galβ1-4Glc-Sp8                                                                            | 292             | 60             | 258             | 46             |
| 44            | [6OSO3]Galβ1-4GlcNAc-Sp8                                                                         | 321             | 82             | -21             | 5              |
| 45            | [6OSO3]Galβ1-4[6OSO3]Glc-Sp8                                                                     | 540             | 181            | 600             | 266            |
| 46            | NeuAc2-3[6OSO3]Galβ1-4GlcNAc-Sp8                                                                 | 239             | 68             | 38              | 41             |
| 47            | [6OSO3]GlcNAc-Sp8                                                                                | 116             | 54             | 90              | 39             |
| 48            | 9NAcNeu5Ac-Sp8                                                                                   | 43              | 18             | 17882           | 7296           |
| 49            | 9NAcNeu5Ac2-6Galβ1-4GlcNAc-Sp8                                                                   | 199             | 87             | 5319            | 2738           |
| 50            | Manα1-3(Manα1-6)Manβ1-4GlcNAcβ1-4GlcNAc-Sp13                                                     | 245             | 102            | 41              | 24             |
| 51            | GlcNAcβ1-2Manα1-3(GlcNAcβ1-2Manα1-6)Manβ1-4GlcNAcβ1-4GlcNAc-Sp13                                 | 237             | 144            | 69              | 57             |
| 52            | Galβ1-4GlcNAcβ1-2Manα1-3(Galβ1-4GlcNAcβ1-2Manα1-6)Manβ1-4GlcNAcβ1-4GlcNAc-Sp13                   | 0               | 21             | 14              | 9              |
| 53            | Neu5Ac2-6Galβ1-4GlcNAcβ1-2Manα1-3(Neu5Ac2-6Galβ1-4GlcNAcβ1-2Manα1-6)Manβ1-4GlcNAcβ1-4GlcNAc-Sp13 | 258             | 59             | 78              | 53             |
| 54            | Neu5Ac2-6Galβ1-4GlcNAcβ1-2Manα1-3(Neu5Ac2-6Galβ1-4GlcNAcβ1-2Manα1-6)Manβ1-4GlcNAcβ1-4GlcNAc-Sp8  | 302             | 43             | 496             | 169            |
| 55            | Fuca1-2Galβ1-3GalNAcβ1-3Gal-Sp9                                                                  | 123             | 36             | 658             | 430            |
| 56            | Fuca1-2Galβ1-3GalNAcβ1-3Galα1-4Galβ1-4Glc-Sp9                                                    | 240             | 77             | -11             | 29             |
| 57            | Fuca1-2Galβ1-3(Fuca1-4)GlcNAc-Sp8                                                                | 203             | 36             | 231             | 203            |
| 58            | Fuca1-2Galβ1-3GalNAc-Sp8                                                                         | 23              | 5              | -16             | 12             |
| 59            | Fuca1-2Galβ1-3GalNAcβ1-4(Neu5Ac2-3)Galβ1-4Glc-Sp0                                                | 133             | 124            | 156             | 110            |
| 60            | Fuca1-2Galβ1-3GalNAcβ1-4(Neu5Ac2-3)Galβ1-4Glc-Sp9                                                | 11              | 18             | 446             | 386            |
| 61            | Fuca1-2Galβ1-3GlcNAcβ1-3Galβ1-4Glc-Sp10                                                          | 81              | 55             | 213             | 124            |
| 62            | Fuca1-2Galβ1-3GlcNAcβ1-3Galβ1-4Glc-Sp8                                                           | 284             | 43             | 193             | 65             |
| 63            | Fuca1-2Galβ1-3GlcNAc-Sp0                                                                         | 188             | 55             | 250             | 73             |
| 64            | Fuca1-2Galβ1-3GlcNAc-Sp8                                                                         | 76              | 48             | 0               | 13             |
| 65            | Fuca1-2Galβ1-4(Fuca1-3)GlcNAcβ1-3Galβ1-4(Fuca1-3)GlcNAc-Sp0                                      | 126             | 39             | 42              | 25             |
| 66            | Fuca1-2Galβ1-4(Fuca1-3)GlcNAcβ1-3Galβ1-4(Fuca1-3)GlcNAcβ1-3Galβ1-4(Fuca1-3)GlcNAc-Sp0            | 149             | 57             | 64              | 39             |
| 67            | Fuca1-2Galβ1-4(Fuca1-3)GlcNAc-Sp0                                                                | 111             | 52             | 286             | 159            |
| 68            | Fuca1-2Galβ1-4(Fuca1-3)GlcNAc-Sp8                                                                | 74              | 71             | 37              | 20             |
| 69            | Fuca1-2Galβ1-4GlcNAcβ1-3Galβ1-4GlcNAc-Sp0                                                        | 242             | 86             | 1477            | 692            |
| 70            | Fuca1-2Galβ1-4GlcNAcβ1-3Galβ1-4GlcNAcβ1-3Galβ1-4GlcNAc-Sp0                                       | 189             | 11             | -32             | 9              |
| 71            | Fuca1-2Galβ1-4GlcNAc-Sp0                                                                         | 1011            | 909            | -30             | 33             |
| 72            | Fuca1-2Galβ1-4GlcNAc-Sp8                                                                         | 24              | 7              | 92              | 76             |
| 73            | Fuca1-2Galβ1-4Glc-Sp0                                                                            | 40              | 48             | 82              | 39             |
| 74            | Fuca1-2Gal-Sp8                                                                                   | 259             | 70             | -9              | 18             |
| 75            | Fuca1-3GlcNAc-Sp8                                                                                | 13              | 20             | 578             | 339            |
| 76            | Fuca1-3GlcNAc-Sp8                                                                                | 0               | 15             | 30              | 15             |
| 77            | Fuca1-4GlcNAc-Sp8                                                                                | 49              | 43             | 704             | 414            |
| 78            | Fucβ1-3GlcNAc-Sp8                                                                                | 168             | 97             | 33              | 20             |

|     |                                                                                                     |       |      |       |      |
|-----|-----------------------------------------------------------------------------------------------------|-------|------|-------|------|
| 79  | GalNAcα1-3(Fuca1-2)Galβ1-3GlcNAcβ-Sp0                                                               | 44    | 15   | 972   | 693  |
| 80  | GalNAcα1-3(Fuca1-2)Galβ1-4(Fuca1-3)GlcNAcβ-Sp0                                                      | 581   | 279  | 7     | 10   |
| 81  | GalNAcα1-3(Fuca1-2)Galβ1-4GlcNAcβ-Sp0                                                               | 138   | 46   | -19   | 11   |
| 82  | GalNAcα1-3(Fuca1-2)Galβ1-4GlcNAcβ-Sp8                                                               | 418   | 322  | 63    | 63   |
| 83  | GalNAcα1-3(Fuca1-2)Galβ1-4Glcβ-Sp0                                                                  | 73    | 37   | 66    | 25   |
| 84  | GalNAcα1-3(Fuca1-2)Galβ-Sp8                                                                         | 67    | 46   | 544   | 215  |
| 85  | GalNAcα1-3GalNAcβ-Sp8                                                                               | 48    | 32   | 46    | 29   |
| 86  | GalNAcα1-3Galβ-Sp8                                                                                  | 451   | 189  | 490   | 180  |
| 87  | GalNAcα1-4(Fuca1-2)Galβ1-4GlcNAcβ-Sp8                                                               | 137   | 80   | 117   | 29   |
| 88  | GalNAcβ1-3GalNAcα-Sp8                                                                               | 63    | 26   | 734   | 467  |
| 89  | GalNAcβ1-3(Fuca1-2)Galβ-Sp8                                                                         | 243   | 36   | 31    | 6    |
| 90  | GalNAcβ1-3Galα1-4Galβ1-4GlcNAcβ-Sp0                                                                 | 168   | 50   | 201   | 51   |
| 91  | GalNAcβ1-4(Fuca1-3)GlcNAcβ-Sp0                                                                      | 28    | 33   | 28    | 13   |
| 92  | GalNAcβ1-4GlcNAcβ-Sp0                                                                               | 127   | 27   | 95    | 43   |
| 93  | GalNAcβ1-4GlcNAcβ-Sp8                                                                               | 113   | 53   | -30   | 12   |
| 94  | Galα1-2Galβ-Sp8                                                                                     | 111   | 17   | 186   | 101  |
| 95  | Galα1-3(Fuca1-2)Galβ1-3GlcNAcβ-Sp0                                                                  | 61    | 18   | 101   | 17   |
| 96  | Galα1-3(Fuca1-2)Galβ1-4(Fuca1-3)GlcNAcβ-Sp0                                                         | 91    | 48   | 986   | 985  |
| 97  | Galα1-3(Fuca1-2)Galβ1-4GlcNAc-Sp0                                                                   | 87    | 50   | 138   | 103  |
| 98  | Galα1-3(Fuca1-2)Galβ1-4Glcβ-Sp0                                                                     | -21   | 9    | -25   | 29   |
| 99  | Galα1-3(Fuca1-2)Galβ-Sp8                                                                            | 85    | 7    | 41    | 9    |
| 100 | Galα1-3(Galα1-4)Galβ1-4GlcNAcβ-Sp8                                                                  | 97    | 24   | 240   | 135  |
| 101 | Galα1-3GalNAcα-Sp8                                                                                  | 178   | 33   | 23    | 14   |
| 102 | Galα1-3GalNAcβ-Sp8                                                                                  | 78    | 38   | 221   | 121  |
| 103 | Galα1-3Galβ1-4(Fuca1-3)GlcNAcβ-Sp8                                                                  | 31    | 35   | 50    | 47   |
| 104 | Galα1-3Galβ1-3GlcNAcβ-Sp0                                                                           | 62    | 36   | 625   | 182  |
| 105 | Galα1-3Galβ1-4GlcNAcβ-Sp8                                                                           | 164   | 48   | 42    | 38   |
| 106 | Galα1-3Galβ1-4Glcβ-Sp0                                                                              | 130   | 33   | 1671  | 1341 |
| 107 | Galα1-3Galβ-Sp8                                                                                     | 222   | 8    | 31    | 47   |
| 108 | Galα1-4(Fuca1-2)Galβ1-4GlcNAcβ-Sp8                                                                  | -3    | 4    | 3180  | 1576 |
| 109 | Galα1-4Galβ1-4GlcNAcβ-Sp0                                                                           | 158   | 55   | -33   | 10   |
| 110 | Galα1-4Galβ1-4GlcNAcβ-Sp8                                                                           | 25    | 12   | 549   | 353  |
| 111 | Galα1-4Galβ1-4Glcβ-Sp0                                                                              | 67    | 24   | 56    | 59   |
| 112 | Galα1-4GlcNAcβ-Sp8                                                                                  | -14   | 19   | 121   | 59   |
| 113 | Galα1-6Glcβ-Sp8                                                                                     | 147   | 28   | 32    | 23   |
| 114 | Galβ1-2Galβ-Sp8                                                                                     | 300   | 127  | 605   | 321  |
| 115 | Galβ1-3(Fuca1-4)GlcNAcβ1-3Galβ1-4(Fuca1-3)GlcNAcβ-Sp0                                               | 7     | 16   | 36    | 30   |
| 116 | Galβ1-3(Fuca1-4)GlcNAcβ1-3Galβ1-4GlcNAcβ-Sp0                                                        | 125   | 58   | 612   | 226  |
| 117 | Galβ1-3(Fuca1-4)GlcNAcβ-Sp0                                                                         | 164   | 84   | -23   | 11   |
| 118 | Galβ1-3(Fuca1-4)GlcNAcβ-Sp8                                                                         | 160   | 107  | 130   | 48   |
| 119 | Galβ1-3(Fuca1-4)GlcNAcβ-Sp8                                                                         | 50    | 24   | 25    | 14   |
| 120 | Galβ1-3(Galβ1-4GlcNAcβ1-6)GalNAcα-Sp8                                                               | 9     | 30   | 563   | 310  |
| 121 | Galβ1-3(GlcNAcβ1-6)GalNAcα-Sp8                                                                      | 27    | 32   | -7    | 23   |
| 122 | Galβ1-3(Neu5Aca2-6)GalNAcα-Sp8                                                                      | -22   | 18   | 58    | 14   |
| 123 | Galβ1-3(Neu5Aca2-6)GalNAcα-Sp8                                                                      | 67    | 42   | 32    | 29   |
| 124 | Galβ1-3(Neu5Aca2-6)GlcNAcβ1-4Galβ1-4Glcβ-Sp10                                                       | 89    | 40   | 494   | 184  |
| 125 | Galβ1-3GalNAcα-Sp8                                                                                  | 270   | 72   | -20   | 9    |
| 126 | Galβ1-3GalNAcβ-Sp8                                                                                  | 59    | 80   | 503   | 354  |
| 127 | Galβ1-3GalNAcβ1-3Galα1-4Galβ1-4Glcβ-Sp0                                                             | 44    | 11   | 14    | 32   |
| 128 | Galβ1-3GalNAcβ1-4(Neu5Aca2-3)Galβ1-4Glcβ-Sp0                                                        | 117   | 61   | 594   | 225  |
| 129 | Galβ1-3GalNAcβ1-4Galβ1-4Glcβ-Sp8                                                                    | 194   | 66   | 12    | 17   |
| 130 | Galβ1-3Galβ-Sp8                                                                                     | 74    | 38   | 517   | 245  |
| 131 | Galβ1-3GlcNAcβ1-3Galβ1-4GlcNAcβ-Sp0                                                                 | 149   | 80   | -7    | 16   |
| 132 | Galβ1-3GlcNAcβ1-3Galβ1-4Glcβ-Sp10                                                                   | 167   | 43   | 172   | 55   |
| 133 | Galβ1-3GlcNAcβ-Sp0                                                                                  | 120   | 78   | -12   | 17   |
| 134 | Galβ1-3GlcNAcβ-Sp8                                                                                  | 502   | 160  | 875   | 807  |
| 135 | Galβ1-4(Fuca1-3)GlcNAcβ-Sp0                                                                         | 36    | 16   | 51    | 42   |
| 136 | Galβ1-4(Fuca1-3)GlcNAcβ-Sp8                                                                         | 130   | 126  | 87    | 64   |
| 137 | Galβ1-4(Fuca1-3)GlcNAcβ1-4Galβ1-4(Fuca1-3)GlcNAcβ-Sp0                                               | 30    | 22   | 52    | 30   |
| 138 | Galβ1-4(Fuca1-3)GlcNAcβ1-4Galβ1-4(Fuca1-3)GlcNAcβ-Sp0                                               | 191   | 176  | 431   | 237  |
| 139 | Galβ1-4[6OSO3]Glcβ-Sp0                                                                              | 139   | 59   | 1     | 16   |
| 140 | Galβ1-4[6OSO3]Glcβ-Sp8                                                                              | -2    | 26   | 537   | 236  |
| 141 | Galβ1-4GalNAcα1-3(Fuca1-2)Galβ1-4GlcNAcβ-Sp8                                                        | 249   | 81   | 93    | 56   |
| 142 | Galβ1-4GalNAcβ1-3(Fuca1-2)Galβ1-4GlcNAcβ-Sp8                                                        | 83    | 9    | 123   | 114  |
| 143 | Neu5Aca2-3Galβ1-4GlcNAcβ1-2Manα1-3(Neu5Aca2-3Galβ1-4GlcNAcβ1-2Manα1-6)Manβ1-4GlcNAcβ1-4GlcNAcβ-Sp12 | 166   | 92   | 30636 | 5205 |
| 144 | Galβ1-4GlcNAcβ1-3GalNAcα-Sp8                                                                        | 66    | 20   | 89    | 40   |
| 145 | Galβ1-4GlcNAcβ1-3Galβ1-4(Fuca1-3)GlcNAcβ1-3Galβ1-4(Fuca1-3)GlcNAcβ-Sp0                              | 251   | 95   | 403   | 180  |
| 146 | Galβ1-4GlcNAcβ1-3Galβ1-4GlcNAcβ1-3Galβ1-4GlcNAcβ-Sp0                                                | 65    | 35   | -4    | 20   |
| 147 | Galβ1-4GlcNAcβ1-3Galβ1-4GlcNAcβ-Sp0                                                                 | 728   | 644  | 35    | 15   |
| 148 | Galβ1-4GlcNAcβ1-3Galβ1-4Glcβ-Sp0                                                                    | -4    | 17   | 54    | 56   |
| 149 | Galβ1-4GlcNAcβ1-3Galβ1-4Glcβ-Sp8                                                                    | 204   | 104  | 138   | 18   |
| 150 | Galβ1-4GlcNAcβ1-6(Galβ1-3)GalNAcα-Sp8                                                               | 59    | 22   | 22    | 34   |
| 151 | Galβ1-4GlcNAcβ1-6GalNAcα-Sp8                                                                        | 59    | 22   | 63    | 107  |
| 152 | Galβ1-4GlcNAcβ-Sp0                                                                                  | 58    | 25   | 57    | 15   |
| 153 | Galβ1-4GlcNAcβ-Sp8                                                                                  | 33    | 24   | 43    | 79   |
| 154 | Galβ1-4Glcβ-Sp0                                                                                     | 326   | 102  | 28    | 17   |
| 155 | Galβ1-4Glcβ-Sp8                                                                                     | 270   | 78   | 268   | 89   |
| 156 | GlcNAcα1-3Galβ1-4GlcNAcβ-Sp8                                                                        | 93    | 29   | 7     | 14   |
| 157 | GlcNAcα1-6Galβ1-4GlcNAcβ-Sp8                                                                        | 50680 | 7409 | 697   | 285  |
| 158 | GlcNAcβ1-2Galβ1-3GalNAcα-Sp8                                                                        | 155   | 68   | -10   | 3    |
| 159 | GlcNAcβ1-3(GlcNAcβ1-6)GalNAcα-Sp8                                                                   | 131   | 143  | 428   | 45   |
| 160 | GlcNAcβ1-3(GlcNAcβ1-6)Galβ1-4GlcNAcβ-Sp8                                                            | 100   | 46   | 58    | 36   |
| 161 | GlcNAcβ1-3GalNAcα-Sp8                                                                               | 3     | 7    | 167   | 78   |

|     |                                                                                                     |      |      |       |      |
|-----|-----------------------------------------------------------------------------------------------------|------|------|-------|------|
| 162 | GlcNAcβ1-3Galβ-Sp8                                                                                  | 19   | 9    | 1     | 12   |
| 163 | GlcNAcβ1-3Galβ1-3GalNAcα-Sp8                                                                        | 40   | 46   | -7    | 18   |
| 164 | GlcNAcβ1-3Galβ1-4GlcNAcβ-Sp0                                                                        | 24   | 11   | 7     | 25   |
| 165 | GlcNAcβ1-3Galβ1-4GlcNAcβ-Sp8                                                                        | 99   | 12   | 90    | 27   |
| 166 | GlcNAcβ1-3Galβ1-4GlcNAcβ1-3Galβ1-4GlcNAcβ-Sp0                                                       | 204  | 74   | 71    | 99   |
| 167 | GlcNAcβ1-3Galβ1-4Glcβ-Sp0                                                                           | 173  | 39   | 361   | 144  |
| 168 | GlcNAcβ1-4MDPLys                                                                                    | 53   | 31   | 61    | 44   |
| 169 | GlcNAcβ1-4(GlcNAcβ1-6)GalNAcα-Sp8                                                                   | 172  | 27   | 95    | 43   |
| 170 | GlcNAcβ1-4Galβ1-4GlcNAcβ-Sp8                                                                        | 92   | 39   | -43   | 10   |
| 171 | (GlcNAcβ1-4)6β-Sp8                                                                                  | 92   | 62   | 1948  | 1928 |
| 172 | (GlcNAcβ1-4)5β-Sp8                                                                                  | 27   | 17   | 76    | 32   |
| 173 | GlcNAcβ1-4GlcNAcβ1-4GlcNAcβ-Sp8                                                                     | 73   | 25   | 16    | 17   |
| 174 | GlcNAcβ1-6(Galβ1-3)GalNAcα-Sp8                                                                      | 1    | 20   | 1     | 31   |
| 175 | GlcNAcβ1-6GalNAcα-Sp8                                                                               | -15  | 17   | 630   | 663  |
| 176 | GlcNAcβ1-6Galβ1-4GlcNAcβ-Sp8                                                                        | 84   | 30   | 51    | 37   |
| 177 | Glcα1-4Glcβ-Sp8                                                                                     | -10  | 16   | 602   | 209  |
| 178 | Glcα1-4Glcα-Sp8                                                                                     | 236  | 24   | -1    | 10   |
| 179 | Glcα1-6Glcα1-6Glcβ-Sp8                                                                              | 63   | 22   | 120   | 34   |
| 180 | Glcβ1-4Glcβ-Sp8                                                                                     | 14   | 33   | 5     | 11   |
| 181 | Glcβ1-6Glcβ-Sp8                                                                                     | 409  | 148  | 29    | 101  |
| 182 | G-ol-Sp8                                                                                            | 322  | 55   | 25    | 17   |
| 183 | GlcAa-Sp8                                                                                           | 225  | 103  | 1099  | 532  |
| 184 | GlcAb-Sp8                                                                                           | 182  | 41   | 42    | 22   |
| 185 | GlcAβ1-3Galβ-Sp8                                                                                    | 128  | 62   | 1089  | 585  |
| 186 | GlcAβ1-6Galβ-Sp8                                                                                    | 131  | 68   | 33    | 16   |
| 187 | KDNα2-3Galβ1-3GlcNAcβ-Sp0                                                                           | 4    | 24   | 130   | 50   |
| 188 | KDNα2-3Galβ1-4GlcNAcβ-Sp0                                                                           | 57   | 28   | 39    | 14   |
| 189 | Manα1-2Manα1-2Manα1-3Manα-Sp9                                                                       | 138  | 149  | 410   | 200  |
| 190 | Manα1-2Manα1-3(Manα1-2Manα1-6)Manα-Sp9                                                              | 66   | 22   | 55    | 43   |
| 191 | Manα1-2Manα1-3Manα-Sp9                                                                              | 25   | 14   | 801   | 207  |
| 192 | Manα1-6(Manα1-2Manα1-3)Manα1-6(Manα2Manα1-3)Manβ1-4GlcNAcβ1-4GlcNAcβ-Sp12                           | 152  | 55   | 10    | 19   |
| 193 | Manα1-2Manα1-6(Manα1-3)Manα1-6(Manα2Manα2Manα1-3)Manβ1-4GlcNAcβ1-4GlcNAcβ-Sp12                      | 57   | 25   | 123   | 44   |
| 194 | Manα1-2Manα1-2Manα1-3(Manα1-2Manα1-3(Manα1-2Manα1-6)Manα1-6)Manβ1-4GlcNAcβ1-4GlcNAcβ-Sp12           | 132  | 40   | 22    | 12   |
| 195 | Manα1-3(Manα1-6)Manα-Sp9                                                                            | 90   | 82   | 340   | 122  |
| 196 | Manα1-3(Manα1-2Manα1-2Manα1-6)Manα-Sp9                                                              | 105  | 24   | -48   | 8    |
| 197 | Manα1-6(Manα1-3)Manα1-6(Manα2Manα1-3)Manβ1-4GlcNAcβ1-4GlcNAcβ-Sp12                                  | 230  | 116  | 239   | 118  |
| 198 | Manα1-6(Manα1-3)Manα1-6(Manα1-3)Manβ1-4GlcNAcβ1-4GlcNAcβ-Sp12                                       | 249  | 205  | -36   | 4    |
| 199 | Neu5Aca2-6Galβ1-4GlcNAcβ1-2Manα1-3(Neu5Aca2-3Galβ1-4GlcNAcβ1-2Manα1-6)Manβ1-4GlcNAcβ1-4GlcNAcβ-Sp12 | 585  | 363  | 4591  | 734  |
| 200 | Manβ1-4GlcNAcβ-Sp0                                                                                  | 48   | 30   | 647   | 337  |
| 201 | Fuca1-3(Galβ1-4)GlcNAcβ1-2Manα1-3(Fuca1-3(Galβ1-4)GlcNAcβ1-2Manα1-6)Manβ1-4GlcNAcβ1-4GlcNAcβ-Sp20   | 49   | 27   | -18   | 11   |
| 202 | Neu5Aca2-3Galβ1-3GalNAcα-Sp8                                                                        | 12   | 42   | 38    | 27   |
| 203 | NeuAca2-8NeuAca2-8NeuAca2-8NeuAca2-3(GalNAcβ1-4)Galβ1-4Glcβ-Sp0                                     | 149  | 58   | 254   | 94   |
| 204 | Neu5Aca2-8Neu5Aca2-8Neu5Aca2-3(GalNAcβ1-4)Galβ1-4Glcβ-Sp0                                           | 198  | 17   | 6     | 28   |
| 205 | Neu5Aca2-8Neu5Aca2-8Neu5Aca2-3Galβ1-4Glcβ-Sp0                                                       | 82   | 22   | 459   | 154  |
| 206 | Neu5Aca2-8Neu5Aca2-3(GalNAcβ1-4)Galβ1-4Glcβ-Sp0                                                     | 139  | 70   | -23   | 9    |
| 207 | Neu5Aca2-8Neu5Aca2-8Neu5Aca-Sp8                                                                     | 109  | 45   | 322   | 137  |
| 208 | Neu5Aca2-3(6-O-Su)Galβ1-4(Fuca1-3)GlcNAcβ-Sp8                                                       | 18   | 33   | 42    | 26   |
| 209 | Neu5Aca2-3(GalNAcβ1-4)Galβ1-4GlcNAcβ-Sp0                                                            | -47  | 13   | 760   | 283  |
| 210 | Neu5Aca2-3(GalNAcβ1-4)Galβ1-4GlcNAcβ-Sp8                                                            | 38   | 30   | 1701  | 1587 |
| 211 | Neu5Aca2-3(GalNAcβ1-4)Galβ1-4Glcβ-Sp0                                                               | 1108 | 1114 | 51    | 67   |
| 212 | NeuAca2-3(NeuAca2-3Galβ1-3GalNAcβ1-4)Galβ1-4Glcβ-Sp0                                                | 1    | 27   | 8552  | 8260 |
| 213 | Neu5Aca2-3(Neu5Aca2-6)GalNAcα-Sp8                                                                   | 44   | 24   | 418   | 422  |
| 214 | Neu5Aca2-3GalNAcα-Sp8                                                                               | 84   | 71   | -7    | 10   |
| 215 | Neu5Aca2-3GalNAcβ1-4GlcNAcβ-Sp0                                                                     | -16  | 18   | 19    | 42   |
| 216 | Neu5Aca2-3Galβ1-3(6OSO3)GlcNAc-Sp8                                                                  | 253  | 128  | 12    | 22   |
| 217 | Neu5Aca2-3Galβ1-3(Fuca1-4)GlcNAcβ-Sp8                                                               | 92   | 6    | 52    | 112  |
| 218 | NeuAca2-3Galβ1-3(Fuca1-4)GlcNAcβ1-3Galβ1-4(Fuca1-3)GlcNAcβ-Sp0                                      | 151  | 25   | 8     | 57   |
| 219 | Neu5Aca2-3Galβ1-3(Neu5Aca2-3Galβ1-4)GlcNAcβ-Sp8                                                     | 87   | 38   | 18985 | 5184 |
| 220 | Neu5Aca2-3Galβ1-3(6OSO3)GalNAcα-Sp8                                                                 | 40   | 18   | -7    | 3    |
| 221 | Neu5Aca2-3Galβ1-3(Neu5Aca2-6)GalNAcα-Sp8                                                            | 2507 | 1622 | 1528  | 661  |
| 222 | Neu5Aca2-3Galβ-Sp8                                                                                  | 9    | 14   | 68    | 53   |
| 223 | NeuAca2-3Galβ1-3GalNAcβ1-3Galα1-4Galβ1-4Glcβ-Sp0                                                    | 4    | 24   | -21   | 34   |
| 224 | NeuAca2-3Galβ1-3GlcNAcβ1-3Galβ1-4GlcNAcβ-Sp0                                                        | 97   | 36   | -5    | 5    |
| 225 | Neu5Aca2-3Galβ1-3GlcNAcβ-Sp0                                                                        | 113  | 48   | 7     | 18   |
| 226 | Neu5Aca2-3Galβ1-3GlcNAcβ-Sp8                                                                        | 497  | 243  | 613   | 484  |
| 227 | Neu5Aca2-3Galβ1-4(6OSO3)GlcNAcβ-Sp8                                                                 | 522  | 126  | 34    | 24   |
| 228 | Neu5Aca2-3Galβ1-4(Fuca1-3)(6OSO3)GlcNAcβ-Sp8                                                        | 68   | 40   | 692   | 252  |
| 229 | Neu5Aca2-3Galβ1-4(Fuca1-3)GlcNAcβ1-3Galβ1-4(Fuca1-3)GlcNAcβ1-3Galβ1-4(Fuca1-3)GlcNAcβ-Sp0           | 24   | 7    | -6    | 32   |
| 230 | Neu5Aca2-3Galβ1-4(Fuca1-3)GlcNAcβ-Sp0                                                               | 172  | 140  | 138   | 70   |
| 231 | Neu5Aca2-3Galβ1-4(Fuca1-3)GlcNAcβ-Sp8                                                               | 92   | 35   | -4    | 22   |
| 232 | Neu5Aca2-3Galβ1-4(Fuca1-3)GlcNAcβ1-3Galβ-Sp8                                                        | 220  | 37   | 1415  | 422  |
| 233 | Neu5Aca2-3Galβ1-4(Fuca1-3)GlcNAcβ1-3Galβ1-4GlcNAcβ-Sp8                                              | 362  | 66   | 94    | 57   |
| 234 | Neu5Aca2-3Galβ1-4GlcNAcβ1-3Galβ1-4(Fuca1-3)GlcNAc-Sp0                                               | 92   | 50   | 632   | 385  |
| 235 | Neu5Aca2-3Galβ1-4GlcNAcβ1-3Galβ1-4GlcNAcβ1-3Galβ1-4GlcNAcβ-Sp0                                      | 292  | 68   | 42    | 14   |
| 236 | Neu5Aca2-3Galβ1-4GlcNAcβ-Sp0                                                                        | 29   | 28   | 433   | 159  |
| 237 | Neu5Aca2-3Galβ1-4GlcNAcβ-Sp8                                                                        | 82   | 25   | 811   | 777  |
| 238 | Neu5Aca2-3Galβ1-4GlcNAcβ1-3Galβ1-4GlcNAcβ-Sp0                                                       | 54   | 21   | 7170  | 4094 |
| 239 | Neu5Aca2-3Galβ1-4Glcβ-Sp0                                                                           | 645  | 451  | 274   | 101  |
| 240 | Neu5Aca2-3Galβ1-4Glcβ-Sp8                                                                           | 153  | 101  | 21    | 30   |
| 241 | Galβ1-4GlcNAcβ1-2Manα1-3(Fuca1-3(Galβ1-4)GlcNAcβ1-2Manα1-6)Manβ1-4GlcNAcβ1-4GlcNAcβ-Sp20            | 72   | 9    | 279   | 205  |
| 242 | Neu5Aca2-6GalNAcα-Sp8                                                                               | 91   | 50   | 32    | 41   |
| 243 | Neu5Aca2-6GalNAcβ1-4GlcNAcβ-Sp0                                                                     | 73   | 20   | -11   | 9    |
| 244 | Neu5Aca2-6Galβ1-4(6OSO3)GlcNAcβ-Sp8                                                                 | 187  | 136  | 531   | 265  |

|     |                                                                                                     |      |      |       |      |
|-----|-----------------------------------------------------------------------------------------------------|------|------|-------|------|
| 245 | Neu5Acα2-6Galβ1-4GlcNAcβ-Sp0                                                                        | 38   | 27   | -10   | 13   |
| 246 | Neu5Acα2-6Galβ1-4GlcNAcβ-Sp8                                                                        | 355  | 202  | 555   | 126  |
| 247 | Neu5Acα2-6Galβ1-4GlcNAcβ1-3Galβ1-4(Fuca1-3)GlcNAcβ1-3Galβ1-4(Fuca1-3)GlcNAcβ-Sp0                    | 108  | 30   | 11    | 25   |
| 248 | Neu5Acα2-6Galβ1-4GlcNAcβ1-3Galβ1-4GlcNAcβ-Sp0                                                       | 253  | 87   | 337   | 160  |
| 249 | Neu5Acα2-6Galβ1-4Glcβ-Sp0                                                                           | 113  | 29   | 50    | 69   |
| 250 | Neu5Acα2-6Galβ1-4Glcβ-Sp8                                                                           | 10   | 18   | 327   | 150  |
| 251 | Neu5Acα2-6Galβ-Sp8                                                                                  | 214  | 82   | 61    | 86   |
| 252 | Neu5Acα2-8Neu5Acα-Sp8                                                                               | -21  | 8    | 3731  | 2206 |
| 253 | Neu5Acα2-8Neu5Acα2-3Galβ1-4Glcβ-Sp0                                                                 | 36   | 16   | -4    | 17   |
| 254 | Neu5Acβ2-6GalNAcα-Sp8                                                                               | 176  | 69   | 860   | 452  |
| 255 | Neu5Acβ2-6Galβ1-4GlcNAcβ-Sp8                                                                        | 3714 | 1022 | 23573 | 9774 |
| 256 | Galβ1-4GlcNAcβ1-2Manα1-3(Neu5Acα2-6Galβ1-4GlcNAcβ1-2Manα1-6)Manβ1-4GlcNAcβ1-4GlcNAcβ-Sp21           | 144  | 24   | 56    | 47   |
| 257 | Neu5Gca2-3Galβ1-3(Fuca1-4)GlcNAcβ-Sp0                                                               | 227  | 65   | 40    | 32   |
| 258 | Neu5Gca2-3Galβ1-3GlcNAcβ-Sp0                                                                        | 254  | 71   | 370   | 188  |
| 259 | Neu5Gca2-3Galβ1-4(Fuca1-3)GlcNAcβ-Sp0                                                               | 15   | 8    | -32   | 20   |
| 260 | Neu5Gca2-3Galβ1-4GlcNAcβ-Sp0                                                                        | 83   | 87   | 634   | 355  |
| 261 | Neu5Gca2-3Galβ1-4Glcβ-Sp0                                                                           | 47   | 6    | 8     | 16   |
| 262 | Neu5Gca2-6GalNAcα-Sp0                                                                               | 235  | 164  | 377   | 222  |
| 263 | Neu5Gca2-6Galβ1-4GlcNAcβ-Sp0                                                                        | 245  | 76   | 57    | 46   |
| 264 | Neu5Gca-Sp8                                                                                         | 129  | 45   | 264   | 91   |
| 265 | [3OSO3]Galβ1-4(Fuca1-3)(6OSO3)Glc-Sp0                                                               | 64   | 36   | 20    | 24   |
| 266 | [3OSO3]Galβ1-4(Fuca1-3)Glc-Sp0                                                                      | 340  | 33   | 1357  | 1253 |
| 267 | [3OSO3]Galβ1-4[Fuca1-3][6OSO3]GlcNAc-Sp8                                                            | 25   | 20   | 31    | 13   |
| 268 | [3OSO3]Galβ1-4[Fuca1-3]GlcNAc-Sp0                                                                   | 312  | 77   | 130   | 143  |
| 269 | Fuca1-2[6OSO3]Galβ1-4GlcNAc-Sp0                                                                     | 67   | 49   | 405   | 427  |
| 270 | Fuca1-2Galβ1-4[6OSO3]GlcNAc-Sp8                                                                     | 156  | 59   | -12   | 13   |
| 271 | Fuca1-2[6OSO3]Galβ1-4[6OSO3]Glc-Sp0                                                                 | -62  | 15   | 68    | 41   |
| 272 | Fuca1-2-(6OSO3)-Galβ1-4Glc-Sp0                                                                      | 3    | 9    | 390   | 318  |
| 273 | Fuca1-2-Galβ1-4[6OSO3]Glc-Sp0                                                                       | 92   | 34   | 60    | 33   |
| 274 | Galβ1-3(Fuca1-4)GlcNAcβ1-3Galβ1-3(Fuca1-4)GlcNAcβ-Sp0                                               | 87   | 23   | 284   | 87   |
| 275 | Galβ1-3-(Galβ1-4GlcNAcβ1-6)GalNAc-Sp14                                                              | 44   | 36   | 78    | 63   |
| 276 | Galβ1-3(GlcNAcβ1-6)GalNAc-Sp14                                                                      | 31   | 28   | 184   | 47   |
| 277 | Galβ1-3-(Neu5Aa2-3Galβ1-4GlcNAcβ1-6)GalNAc-Sp14                                                     | 51   | 6    | 2     | 23   |
| 278 | Galβ1-3GalNAc-Sp14                                                                                  | 97   | 88   | 510   | 266  |
| 279 | Galβ1-3GlcNAcβ1-3Galβ1-3GlcNAcβ-Sp0                                                                 | 96   | 47   | 52    | 42   |
| 280 | Galβ1-4[Fuca1-3][6OSO3]GlcNAc-Sp0                                                                   | 210  | 123  | 293   | 131  |
| 281 | Galβ1-4[Fuca1-3][6OSO3]Glc-Sp0                                                                      | 22   | 11   | 22    | 13   |
| 282 | Galβ1-4(Fuca1-3)GlcNAcβ1-3Galβ1-3(Fuca1-4)GlcNAcβ-Sp0                                               | 69   | 62   | 344   | 159  |
| 283 | Galβ1-4GlcNAcβ1-3Galβ1-3GlcNAcβ-Sp0                                                                 | 33   | 29   | 53    | 22   |
| 284 | Neu5Acα2-3Galβ1-3GlcNAcβ1-3Galβ1-3GlcNAcβ-Sp0                                                       | 60   | 48   | 399   | 345  |
| 285 | Neu5Acα2-3Galβ1-4GlcNAcβ1-3Galβ1-3GlcNAcβ-Sp0                                                       | 51   | 28   | 14    | 19   |
| 286 | [3OSO3]Galβ1-4[6OSO3]GlcNAcβ-Sp0                                                                    | 18   | 26   | 162   | 155  |
| 287 | [3OSO3][4OSO3]Galβ1-4GlcNAcβ-SpSp0                                                                  | 36   | 23   | -37   | 24   |
| 288 | [6OSO3]Galβ1-4[6OSO3]GlcNAcβ-Sp0                                                                    | 34   | 25   | 190   | 116  |
| 289 | 6-H2PO3Glcβ-Sp10                                                                                    | 234  | 66   | -6    | 15   |
| 290 | Galα1-3(Fuca1-2)Galβ-Sp18                                                                           | 165  | 48   | 1350  | 720  |
| 291 | Galα1-3GalNAcα-Sp16                                                                                 | -2   | 9    | 34    | 41   |
| 292 | Galβ1-3GalNAcα-Sp16                                                                                 | 193  | 86   | 225   | 48   |
| 293 | Galβ1-3(Neu5Acα2-3Galβ1-4(Fuca1-3)GlcNAcβ1-6)GalNAc-Sp14                                            | 195  | 48   | 170   | 88   |
| 294 | Galβ1-3Galβ1-4GlcNAcβ-Sp8                                                                           | 238  | 154  | 257   | 173  |
| 295 | Galβ1-4GlcNAcβ1-2Manα1-3(Neu5Acα2-6Galβ1-4GlcNAcβ1-2Manα1-6)Manβ1-4GlcNAcβ1-4GlcNAcβ-Sp12           | 169  | 54   | 42    | 26   |
| 296 | Galβ1-4GlcNAcβ1-3(Galβ1-4GlcNAcβ1-6)Galβ1-4GlcNAc-Sp0                                               | 206  | 120  | 594   | 240  |
| 297 | Galβ1-4GlcNAcβ1-3(GlcNAcβ1-6)Galβ1-4GlcNAc-Sp0                                                      | 76   | 91   | 39    | 25   |
| 298 | Galβ1-4GlcNAcα1-6Galβ1-4GlcNAcβ-Sp0                                                                 | 60   | 72   | 90    | 69   |
| 299 | Galβ1-4GlcNAcβ1-6Galβ1-4GlcNAcβ-Sp0                                                                 | 29   | 69   | -28   | 14   |
| 300 | GalNAcα-Sp15                                                                                        | -23  | 22   | -16   | 61   |
| 301 | GalNAcα1-3(Fuca1-2)Galβ-Sp18                                                                        | 398  | 140  | -9    | 8    |
| 302 | GalNAcβ1-3Galβ-Sp8                                                                                  | 153  | 83   | 272   | 282  |
| 303 | GlcAβ1-3GlcNAcβ-Sp8                                                                                 | 194  | 67   | 41    | 45   |
| 304 | GlcNAcβ1-2Manα1-3(Neu5Acα2-6Galβ1-4GlcNAcβ1-2Manα1-6)Manβ1-4GlcNAcβ1-4GlcNAcβ-Sp12                  | 39   | 11   | 400   | 137  |
| 305 | GlcNAcβ1-2Manα1-3(GlcNAcβ1-2Manα1-6)Manβ1-4GlcNAcβ1-4GlcNAcβ-Sp12                                   | 153  | 63   | 40    | 21   |
| 306 | GlcNAcβ1-3Man-Sp10                                                                                  | 74   | 31   | 81    | 56   |
| 307 | GlcNAcβ1-4GlcNAcβ-Sp10                                                                              | 202  | 60   | 2     | 3    |
| 308 | GlcNAcβ1-4GlcNAcβ-Sp12                                                                              | 12   | 23   | -31   | 29   |
| 309 | HOOC(CH3)CH-3-O-GlcNAcβ1-4GlcNAcβ-Sp10                                                              | 47   | 26   | -25   | 5    |
| 310 | Manα1-3(Manα1-6)Manβ1-4GlcNAcβ1-4GlcNAcβ-Sp12                                                       | 38   | 65   | 29    | 43   |
| 311 | Manα1-6Manβ-Sp10                                                                                    | 21   | 22   | -11   | 16   |
| 312 | Manα1-6(Manα1-3)Manα1-6(Manα1-3)Manβ-Sp10                                                           | 149  | 85   | 90    | 114  |
| 313 | Manα1-2Manα1-2Manα1-3(Manα1-2Manα1-6(Manα1-3)Manα1-6)Manα-Sp9                                       | 373  | 50   | -1    | 16   |
| 314 | Manα1-2Manα1-2Manα1-3(Manα1-2Manα1-6(Manα1-2Manα1-3)Manα1-6)Manα-Sp9                                | 67   | 10   | -46   | 43   |
| 315 | Neu5Acα2-3Galβ1-3(Neu5Acα2-3Galβ1-4GlcNAcβ1-6)GalNAc-Sp14                                           | 34   | 31   | 6240  | 6201 |
| 316 | Neu5Acα2-3Galβ1-3(Neu5Acα2-6)GalNAc-Sp14                                                            | 55   | 33   | 100   | 74   |
| 317 | Neu5Acα2-3Galβ1-3GalNAc-Sp14                                                                        | 46   | 10   | 34    | 11   |
| 318 | Neu5Acα2-3Galβ1-4GlcNAcβ1-2Manα1-3(Neu5Acα2-6Galβ1-4GlcNAcβ1-2Manα1-6)Manβ1-4GlcNAcβ1-4GlcNAcβ-Sp12 | 257  | 59   | 3263  | 1911 |
| 319 | Neu5Acα2-6Galβ1-4GlcNAcβ1-2Manα1-3(Galβ1-4GlcNAcβ1-2Manα1-6)Manβ1-4GlcNAcβ1-4GlcNAcβ-Sp12           | 357  | 55   | 173   | 32   |
| 320 | Neu5Acα2-6Galβ1-4GlcNAcβ1-2Manα1-3(GlcNAcβ1-2Manα1-6)Manβ1-4GlcNAcβ1-4GlcNAcβ-Sp12                  | 21   | 20   | 108   | 139  |
